# Supplementary material for: Seasonal Changes in Colour: A Comparison of Structural, Melanin- and Carotenoid-Based Plumage Colours
Source: PLOS journal article supplement (doi:10.1371/journal.pone.0011582), 2010-07-14
Supplement: S1 (10.1371/journal.pone.0011582.s001) [file journal.pone.0011582.s001]

**Robin****Breast**

| month     | Males | Females |
|-----------|-------|---------|
| August    | 2     | 1       |
| September | 25    | 21      |
| October   | 38    | 24      |
| November  | 8     | 6       |
| December  | 5     | 2       |
| January   | 3     | 0       |
| February  | 0     | 0       |
| March     | 13    | 8       |
| April     | 18    | 29      |
| May       | 11    | 4       |
| June      | 7     | 4       |
| July      | 4     | 3       |

**Robin****Back**

| month     | Males | Females |
|-----------|-------|---------|
| August    | 2     | 1       |
| September | 25    | 21      |
| October   | 38    | 24      |
| November  | 8     | 6       |
| December  | 5     | 2       |
| January   | 3     | 0       |
| February  | 0     | 0       |
| March     | 13    | 8       |
| April     | 18    | 29      |
| May       | 11    | 4       |
| June      | 7     | 4       |
| July      | 4     | 3       |

**Blackbird****Crown**

| month     | Males | Females |
|-----------|-------|---------|
| August    | 0     | 0       |
| September | 3     | 2       |
| October   | 8     | 13      |
| November  | 3     | 3       |
| December  | 2     | 1       |
| January   | 0     | 0       |
| February  | 4     | 2       |
| March     | 8     | 1       |
| April     | 17    | 4       |
| May       | 39    | 7       |
| June      | 7     | 4       |
| July      | 1     | 1       |

**Blackbird****Bill**

| month     | Males | Females |
|-----------|-------|---------|
| August    | 0     | 0       |
| September | 3     | 3       |
| October   | 8     | 13      |
| November  | 3     | 3       |
| December  | 1     | 1       |
| January   | 0     | 0       |
| February  | 4     | 2       |
| March     | 8     | 1       |
| April     | 17    | 4       |
| May       | 39    | 7       |
| June      | 7     | 4       |
| July      | 1     | 1       |

**Blackbird****Breast**

| month     | Males | Females |
|-----------|-------|---------|
| August    | 0     | 0       |
| September | 3     | 3       |
| October   | 8     | 13      |
| November  | 3     | 3       |
| December  | 2     | 1       |
| January   | 0     | 0       |
| February  | 4     | 2       |
| March     | 8     | 1       |
| April     | 17    | 4       |
| May       | 39    | 7       |
| June      | 7     | 4       |
| July      | 1     | 1       |

**Blackbird****Back**

| month     | Males | Females |
|-----------|-------|---------|
| August    | 0     | 0       |
| September | 3     | 3       |
| October   | 8     | 13      |
| November  | 3     | 3       |
| December  | 2     | 1       |
| January   | 0     | 0       |
| February  | 4     | 2       |
| March     | 8     | 1       |
| April     | 17    | 4       |
| May       | 39    | 7       |
| June      | 7     | 4       |
| July      | 1     | 1       |

**Table S1 (cont.)****Blue tit**

| Crown     |       |         |
|-----------|-------|---------|
| month     | Males | Females |
| August    | 0     | 0       |
| September | 5     | 4       |
| October   | 17    | 10      |
| November  | 25    | 15      |
| December  | 3     | 4       |
| January   | 19    | 20      |
| February  | 3     | 4       |
| March     | 7     | 9       |
| April     | 27    | 4       |
| May       | 15    | 3       |
| June      | 0     | 0       |
| July      | 0     | 0       |

**Blue tit**

| Cheek     |       |         |
|-----------|-------|---------|
| month     | Males | Females |
| August    | 0     | 0       |
| September | 5     | 4       |
| October   | 17    | 10      |
| November  | 25    | 14      |
| December  | 3     | 4       |
| January   | 19    | 20      |
| February  | 3     | 4       |
| March     | 6     | 9       |
| April     | 27    | 4       |
| May       | 15    | 3       |
| June      | 0     | 0       |
| July      | 0     | 0       |

**Blue tit**

| Breast    |       |         |
|-----------|-------|---------|
| month     | Males | Females |
| August    | 0     | 0       |
| September | 5     | 4       |
| October   | 17    | 10      |
| November  | 25    | 15      |
| December  | 3     | 4       |
| January   | 19    | 20      |
| February  | 3     | 4       |
| March     | 7     | 9       |
| April     | 27    | 4       |
| May       | 15    | 3       |
| June      | 0     | 0       |
| July      | 0     | 0       |

**Blue tit**

| Back      |       |         |
|-----------|-------|---------|
| month     | Males | Females |
| August    | 0     | 0       |
| September | 5     | 4       |
| October   | 17    | 10      |
| November  | 25    | 15      |
| December  | 3     | 4       |
| January   | 19    | 20      |
| February  | 3     | 4       |
| March     | 7     | 9       |
| April     | 27    | 4       |
| May       | 15    | 3       |
| June      | 0     | 0       |
| July      | 0     | 0       |

**Great tit**

| Crown     |       |         |
|-----------|-------|---------|
| month     | Males | Females |
| August    | 2     | 0       |
| September | 6     | 6       |
| October   | 18    | 8       |
| November  | 15    | 5       |
| December  | 6     | 4       |
| January   | 37    | 22      |
| February  | 15    | 15      |
| March     | 17    | 18      |
| April     | 38    | 24      |
| May       | 27    | 7       |
| June      | 7     | 2       |
| July      | 0     | 0       |

**Great tit**

| Cheek     |       |         |
|-----------|-------|---------|
| month     | Males | Females |
| August    | 2     | 0       |
| September | 6     | 6       |
| October   | 18    | 8       |
| November  | 15    | 5       |
| December  | 6     | 4       |
| January   | 37    | 22      |
| February  | 15    | 15      |
| March     | 17    | 18      |
| April     | 38    | 24      |
| May       | 27    | 7       |
| June      | 7     | 2       |
| July      | 0     | 0       |

**Great tit**

| Breast    |       |         |
|-----------|-------|---------|
| month     | Males | Females |
| August    | 2     | 0       |
| September | 6     | 6       |
| October   | 18    | 8       |
| November  | 16    | 5       |
| December  | 6     | 4       |
| January   | 37    | 22      |
| February  | 15    | 15      |
| March     | 17    | 18      |
| April     | 38    | 24      |
| May       | 27    | 7       |
| June      | 7     | 2       |
| July      | 0     | 0       |

**Great tit**

| Back      |       |         |
|-----------|-------|---------|
| month     | Males | Females |
| August    | 2     | 0       |
| September | 6     | 6       |
| October   | 18    | 8       |
| November  | 16    | 5       |
| December  | 6     | 4       |
| January   | 37    | 22      |
| February  | 15    | 15      |
| March     | 17    | 18      |
| April     | 38    | 24      |
| May       | 27    | 7       |
| June      | 7     | 2       |
| July      | 0     | 0       |
